# Supplementary material for: Structural features of selected protic ionic liquids based on a super-strong base
Source: Royal Society of Chemistry journal article supplement (doi:10.1039/c9cp03927a), 2019-01-01
Supplement: c9cp03927a1.pdf [file c9cp03927a1.pdf]

## Structural features of selected protic ionic liquids based on a super-strong base.

Alessandro Triolo<sup>1,\*</sup>, Fabrizio Lo Celso<sup>2</sup>, Carlo Ottaviani<sup>1</sup>, Pengju Ji<sup>3</sup>, Giovanni Battista Appetecchi<sup>4</sup>, Francesca Leonelli<sup>5</sup>, Dean S. Keeble<sup>6</sup> and Olga Russina<sup>7,\*</sup>.

<sup>1</sup> Laboratorio Liquidi Ionici, Istituto Struttura della Materia, Consiglio Nazionale delle Ricerche, (ISM-CNR) Rome, Italy

<sup>2</sup> Department of Physics and Chemistry, Università di Palermo, Palermo, Italy.

<sup>3</sup> Center of Basic Molecular Science (CBMS), Department of Chemistry, Tsinghua University, Beijing 100084, China

<sup>4</sup> ENEA, SSPT-PROMAS-MATPRO Technical Unit, Rome, Italy.

<sup>5</sup> Department of Environmental Biology, University of Rome Sapienza, Rome, Italy

<sup>6</sup> Diamond Light Source, Harwell Campus, Didcot OX11 0DE UK

<sup>7</sup> Department of Chemistry, University of Rome Sapienza, Rome, Italy

Corresponding Authors: A. T. ([triolo@ism.cnr.it](mailto:triolo@ism.cnr.it)); O.R. ([olga.russina@uniroma1.it](mailto:olga.russina@uniroma1.it))

## Supporting information

### Density.

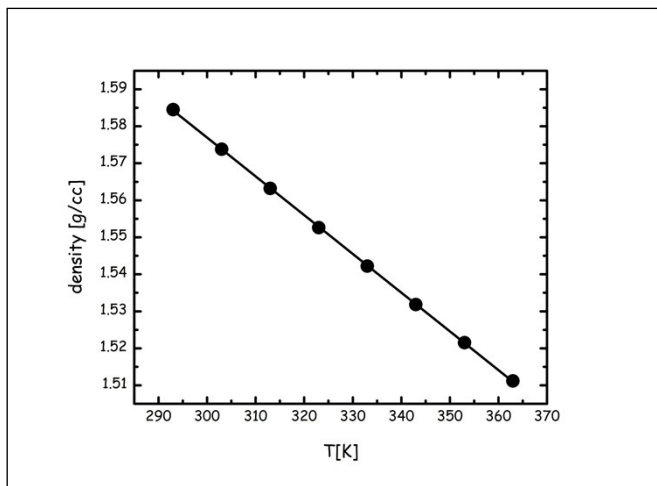

Density of [DBUH][IM14]. Experimental data have been modelled with a linear trend (continuous line):

$$\rho \text{ [g/cc]} = a \cdot T \text{ [K]} + b, \text{ with } a = 0.001047 \text{ (} 3 \cdot 10^{-6} \text{) K}^{-1} \text{ and } b = 1.891 \text{ (} 1 \cdot 10^{-3} \text{) (} R^2 = 0.99994 \text{)}$$

## Viscosity.

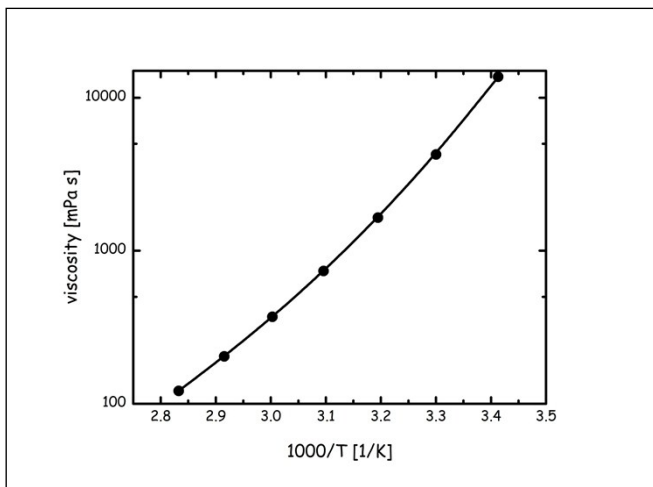

Viscosity of [DBUH][IM14]. Experimental data have been modelled with the trend (continuous line):

$$\eta(\text{mPa s}) = \eta_0 \exp [B/(T-T_0)]; \text{ with } \eta_0 = 0.070 (0.001) \text{ mPa s, } B=1172 (1) \text{ K}^{-1}, T_0=197 (1) \text{ K.}$$

( $R^2=0.99992$ )

## Molar conductance.

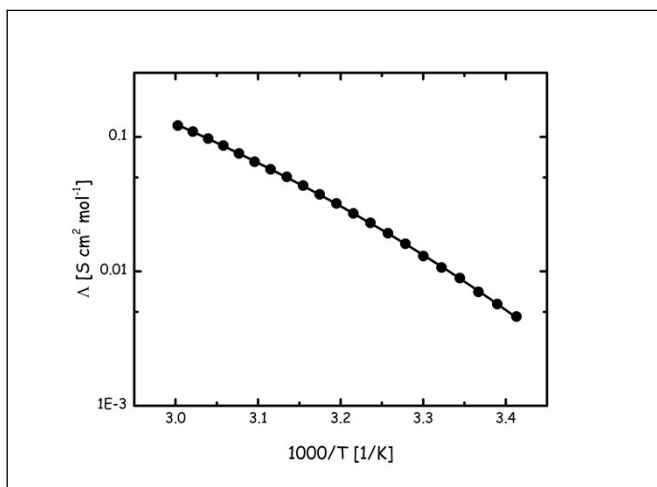

Molar conductance of [DBUH][IM14]. Experimental data have been modelled with the trend (continuous line):

$$\Lambda \text{ (S cm}^2 \text{ mol}^{-1}\text{)} = \Lambda_0 \exp [-B/(T-T_0)]; \text{ with } \Lambda_0 = 139 \text{ (3) S cm}^2 \text{ mol}^{-1}, B=890 \text{ (2) K}^{-1}, T_0=208 \text{ (2) K. (R}^2=0.99985\text{)}$$

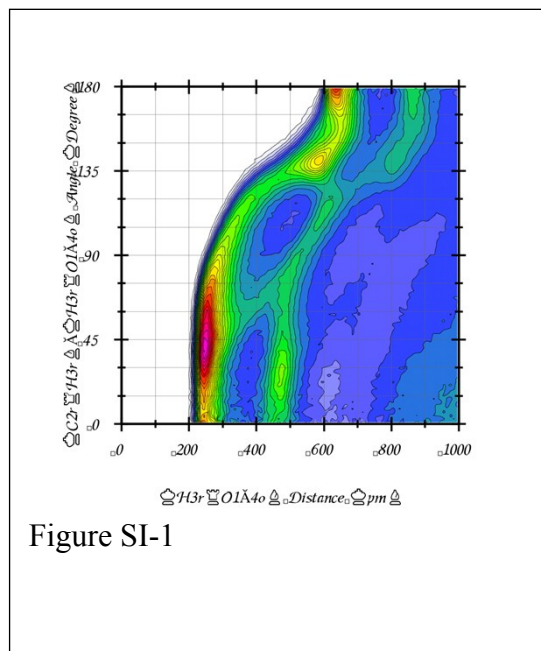

Combined Distribution Function obtained from the MD study of an aprotic IL based on the [IM14] anion and the 1-octyl,3-methylimidazolium cation ([C8mim][IM14]), highlighting the structural features of the hydrogen bonding interactions therein between the anion and the acidic H atom between the two imidazolium Nitrogen atoms.
